# Supplementary material for: Cyclin K goes with Cdk12 and Cdk13
Source: Springer Nature journal article supplement (doi:10.1186/1747-1028-7-12), 2012-01-01
Supplement: 13008_2012_156_MOESM1_ESM.pdf [file 13008_2012_156_MOESM1_ESM.pdf]

A

CycK

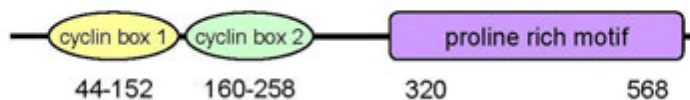

1-580

B

Cdk12

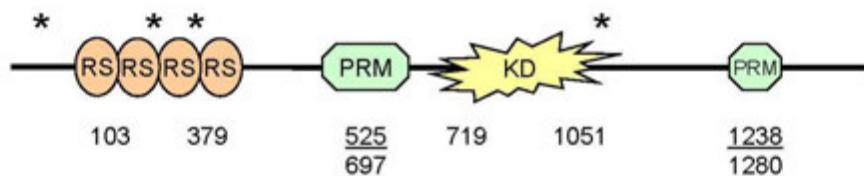

1-1490

Cdk13

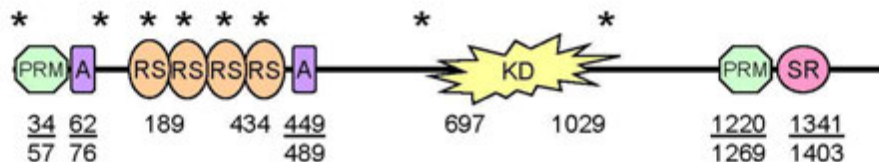

1-1512
